# Supplementary material for: The tradition of washing hands in a common bowl before eating: a qualitative study of the practice of communal bowl hand rinsing before mealtimes, in rural and urban Mali
Source: Research Square preprint supplement (doi:10.21203/rs.3.rs-4999129/v1), 2024-10-22
Supplement: Supplementary file 1 [file 0bfef9ac03db48ecf526e4c0.docx]

**Additional 2 – Focus Group Topic Guide**

**Focus Group (FG) topics**

**Q1) Discuss views on breastfeeding.**

Prompt 1.1) Do you believe in or practice colostrum feeding of newborns? (Discuss all positives and negatives and what you think about colostrum, why you believe/practice and why you don't believe/practice)

*Probe for example: Throw away because it is unhealthy, messy. Negative effects on children's health, difficult to swallow and digest due to thick and sticky/too heavy, our standard that colostrum should be discarded until normal milk comes in, colostrum may harm to the newborn because it is stored in the breast throughout pregnancy,*

Prompt 1.2) Besides breast milk, do you believe or do you usually give food, water, tea, juice, medicines and supplements to babies before 6 months of age? What are the reasons for these practices?

*Probe for example: Give water to satisfy water needs, after the immediate birth of the child, honey, etc. is a common cultural practice, water is essential for maintaining the nutritional status of the child*

Prompt 1.3) Who teaches mothers to adopt these feeding practices? Don't accept "the mother knows it herself", ask her how she knows it.

*For example, encouraging questions: Health worker/Community health worker, mother-in-law, family members, mother, parents, friends*

Prompt 1.4.) When should the first complementary food be given? and what is it made of? (What are the reasons for the mentioned age?)

Free list

Prompt 1.5) What are the local taboos or beliefs about what babies should or should not eat between 0-6 months and 6-12 months and 12-24 months?

*Probe for example:*

*Should eat: Initiation with soft/liquid then semi-solid and solid diets*

*Do not eat: effects of hot and cold, for example, fruits such as banana, orange have cold effects, beans and mashed potatoes are difficult to digest, sweets are not good for the teeth and cause stomach pain and worm infections,*

*Suggestion :*

*Does the mother think her child has enough to eat? Is it sometimes or most of the time or all the time?*

*What foods would she like to give the baby but cannot? And why can't she give them to the baby?*

**Q2) Discuss the child's food chain: from buying, storing, cooking, feeding and storing, reheating, etc.**

Prompt 2.1) Check with the mother how often she does this shopping for ingredients, storing food for children. If she doesn't prepare children's food, ask her for adult/family food.

*Free list*

Prompt 2.2) Are there times when the mother does something different?

Prompt 2.3) What makes food prepared this way different? (Other factors, time, weather, access to resources)

Prompt 2.4) who decides and influences the food prepared for the child and the rest of the family.

*Probes: The mother herself, the father, the grandmother, a family member, no one decides, it depends on the availability*

Prompt 2.5) what are the sources of drinking water and cooking water (and milk).

**Q3) Discuss food preparation time and identify the 5 most common behaviors/actions used to prepare healthy and good food and why? (i.e. raw components to ready meals)**

Prompt 3.1) Any steps that make food preparation more efficient or easier?

*Probes: easy to cook like potato, porridge etc., prepare food while baby sleeps, get help from others*

Prompt 3.2) Would mothers like to change this preparation process in any way?

*Free listing*

Prompt 3.3) State motivations for cooking baby food – what encourages you/mothers to (or is encouraging to you when you) cook/feed your child? Why do you cook?

**Q4) Discuss child feeding practices (when, what, how and why?) and identify five key behaviors that are important and why?**

*Probes: (when) age of complementary feeding, feed 2-3 meals a day (what) gentle diet, food diversity (how) spoon / cup, hand (why) child health / active*

Prompt 4.1) Does anyone help feed the baby?

*Probes: father, mother-in-law, family members*

Prompt 4.2) Does anyone comment on how the baby should be fed?

*Probes: age of complementary feeding, times, quantity, quality, cup/spoon,*

Prompt 4.3) What do you / the mother like or dislike about this technique?

Prompt 4.4) What makes this easier?

*Free listing*

Prompt 4.5) What makes this more difficult?

*Probes: barriers to availability, lack of support, influence of child's behavior on feeding choices, inability to give enough attention*

Prompt 4.6) What does the mother do to prepare before she begins feeding the child?

*Free listing*

**Q5) Discuss food storage practices, storage duration and identify at least five key behaviors that are important and why? If don't stock children's food, ask about adult food.**

Prompt 5.1) Are there spaces to store food?

*Probes: working refrigerator, containers to avoid contact between raw and prepared foods, covered jars to protect food from insects/flies/dust, etc.*

Prompt 5.2) How do you store/containers?

Prompt Q5.3) What state are the Storage Spaces in?

Prompt 5.4) How did the mothers know how to store this food?

Prompt 5.5) How long do you store food?

Prompt 5.6) What are the obstacles to food preservation?

Prompt 5.7) Is food reheated before eating? Per child or adult?

Prompt 5.8) In your community, what is used to heat food?

Prompt 5.9) Do you have any thoughts on heating leftover food?

Prompt 5.10) What difficulties do you have in reheating food?

Prompt 5.11) Why should we reheat leftover food?

**Q6) Ask about aspects of hand washing**

Prompt 6.1) When do people wash their hands only with water?

Prompt 6.2) When do people wash their hands with soap and water?

Prompt 6.3) What is the relationship between handwashing and cooking?

Prompt 6.4) What are the challenges in your community to washing hands with soap and water?

**Q7) Ask how young children usually play**

Prompt 6.1) When children (6-24 months) are not carried on their mothers' backs, sleeping or eating, what do they do?

Prompt 6.2) who takes care of the child usually or at other times and what do they do together?

Prompt 6.3) How do mothers ensure that the young child stays safe – does not hurt or injure himself in any way?

Prompt 6.4) Do you have any concerns for your child's health or safety when playing?

Prompt 6.5) Do you have a special place where your child plays? Is it important for your child to have a safe place to play?

Prompt 6.6) Are there toys that children of this age play with on the floor?

Prompt 6.7) What kinds of things does your baby like to play with? Is it important to you that your child has things to play with?

Prompt 6.8) What do you think, as mothers or community members, of children who eat dirt or yard objects outside the house?

Prompt 6.9) Is this common behavior? And what do children usually eat in the ground?

Prompt 6.10) Perceived severity: Are you concerned that there is...

has. Chicken droppings where your child plays?

b. Cattle faeces where your child plays?

vs. Adult faeces where your child plays? What about other children's faeces?

Prompt 6.11) What do mothers or others do when they see the baby eating dirt, feces or other things from the ground?

**Animal Husbandry Practices**

What are the animals in your household?

Are the animals generally confined (in a cage or enclosure) or are they left free? Or both ? (And why ?)

Where do animals sleep during the day and at night? (And why ?)

Do you prefer this solution? If yes, why ?

If not, what could change that? If it can't be changed, why not?

**Q8) Source of information available in your community and in gatherings and groups?**

Prompt 8.1) How do you receive health education in your community? e.g. radio, television, mosque, health worker, elderly female relatives, community elders

Prompt 8.2) What are the committees in your area? eg women's groups, water committee, political groups, men's elders committee

Prompt 8.3) Who are the influential people in your community? men and women, e.g. doctor, imam, political leader, etc.

**Q9) In your community, how do people celebrate happy events?**

Prompt 9.1) where, for men and women

Prompt 9.2) how's it going for men and women, who takes care of entertainment (e.g. all of us and anyone can sing or play anything, or there are known musicians in the community or exist traditionally, but we don't have any here…)

Prompt 9.3) Is there a place where men and women can get together and watch or hear something, eg school events, political events?
