# Supplementary material for: The tradition of washing hands in a common bowl before eating: a qualitative study of the practice of communal bowl hand rinsing before mealtimes, in rural and urban Mali
Source: Research Square preprint supplement (doi:10.21203/rs.3.rs-4999129/v1), 2024-10-22
Supplement: Supplementary file 2 [file b281740a6ff76c8f0a016238.docx]

**Additional 1 – Interview Topic Guide**

Introduction:

Introduce self. This interview aims to find out the practice of communal handwashing and importance of such practice within your household. It is important to know your thoughts about the frequency of this practice and how important it is for you to keep up with this practice. There are no right or wrong answers, we are interested in your views. So, feel free to tell me everything you know about this daily practice of communal handwashing.

Confirm written consent for taking part in the interview today and for it to be audio recorded. Explain – real names will not be used for any published material.

Main Questions in bold, *Prompts in italics.*

Opening Questions:

1. Please could you describe what you understand by proper handwashing
2. Please could you describe how you wash your hands before eating?
3. Do you wash your hands in the common (communal) bowl? Please describe how this is done?
4. When (which mealtimes and how long before meal time and in what order of people) do you wash your hands in this common bowl?
5. How do you wash your hands in this common bowl (prompt to know if hands are washed with simple water or with soap)
6. Do you ever remember there being different ways of doing this?
7. Have you seen handwashing done differently in different places?
8. What does it mean for your family to participate in communal handwashing?
9. What would be lost if you didn’t?

1. What do you do to the water in the common bowl after washing?
2. If it is use for drinking, please could you explain who drinks it and why?

1. What is/are the reasons that motivate you to continue washing in this communal bowl?
2. Please could you tell me why you (and your family) choose to wash your hands in the common bowl instead of individual washing or what you have previously heard about proper handwashing?
3. Has there been a time you or someone in your household refuse to wash their hands in the common bowl for any reasons or did not wash in the communal bowl due to some reason e.g., illness or epidemic of something? If yes, please describe what happened?

1. (For mother only) Before feeding the baby, how would you feel about washing your hands (and baby’s hands) with the soap after washing in the communal bowl with the rest of the family?
2. How comfortable will you feel about this?
3. Would it be allowed?
4. Or would it be allowed that you do not do the communal handwashing and instead just use soap and water (e.g. the washing device kettle and bowl) to wash your hands with soap so that you can feed the baby in the best way you can?
5. Or what other things could you do to make sure you and your baby’s hands get washed with soap and water?

1. (For head of family and mother) Irrespective of a baby in the family, how do you feel about using soap when washing hands in the common bowl and rinsing it afterwards in the same bowl or in a different bowl?
2. Do you know how other members of your household will feel about using soap in a common bowl and having to rinse afterwards?
3. What do you think could motivate you and your household members to use soap during communal handwashing?
4. Given the importance of soap during hand washing especially during Covid-19 and Ebola, why do you and other household members still wash hands without soap? Or wash your hand in a common bowl?

End of interview for head of household- Skip to question 12 and afterwards read the closing statement.

Continue for mothers only

1. Please could you describe in a typical day when and what you feed your child?

(After she has finished describing the typical day’s meal for the child, you can now prompt the following to fill the gaps if she misses out one of these. Prompt her gently ‘What about snacks – does your child have snacks between these meals you mentioned? Or what about breakfast? Does your child have something special for breakfast….etc)

1. For breakfast
2. For lunch
3. For dinner
4. Do you give your child any snacks between these meals – remind the mother before breakfast, before lunch, before dinner and after dinner?

1. Do you normally keep food from one meal to another meal or snack for your child (e.g. do you cook a little extra at lunch to keep for child’s snack or dinner or if any food is not eaten by the child, do you keep it for later?) Please describe how you feed your child such kind of cooked and stored food?
2. Do you reheat the food? If yes, why do you reheat it? Describe how you go about it
3. If no, please tell me why you don’t reheat your child stored food before feeding him/her?

1. How/where do you keep family’s drinking water? How different do you store drinking water for the child compared to family’s drinking water?
2. Do you treat or boil the water before giving to the child?

1. Please could you tell us about the milk you give to your child besides breastmilk?
2. Describe what type of milk and how you prepare it before giving it to the child?
3. How often do you give milk to your child in a typical day?
4. Do you give your child warm bottle (powdered milk and hot water)?

1. Do you have a vegetable or kitchen garden?

Closing Question:

1. Is there anything else you would like to tell me today about communal handwashing and health?
2. Anything you wish to talk about that we haven’t already covered.

Closing Statement:

On behalf of the MaaCiwara research team, USTTB and University of Birmingham, UK, I would like to “Thank you” for participating in this handwashing study and for taking the time to share with me your thoughts about communal handwashing.
